# Supplementary material for: Chemoselective synthesis of propionic acid from biomass and lactic acid over a cobalt catalyst in aqueous media
Source: Royal Society of Chemistry journal article supplement (doi:10.1039/c6gc03036j), 2017-01-01
Supplement: c6gc03036j1.pdf [file c6gc03036j1.pdf]

**Supporting information**

**Chemoselective synthesis of propionic acid from biomass and lactic acid over  
cobalt catalyst in aqueous media**

Zhibao Huo,\* Jiefeng Xiao, Dezhang Ren, Fangming Jin,\* Tian Wang, Guodong Yao

School of Environmental Science and Engineering, the State Key Laboratory of Metal  
Matrix Composites, Shanghai Jiao Tong University, 800 Dongchuan Road, Shanghai  
200240, China

Corresponding author.

Zhibao Huo, [hz410@sjtu.edu.cn](mailto:hz410@sjtu.edu.cn)

Fangming Jin, [fmjin@sjtu.edu.cn](mailto:fmjin@sjtu.edu.cn)

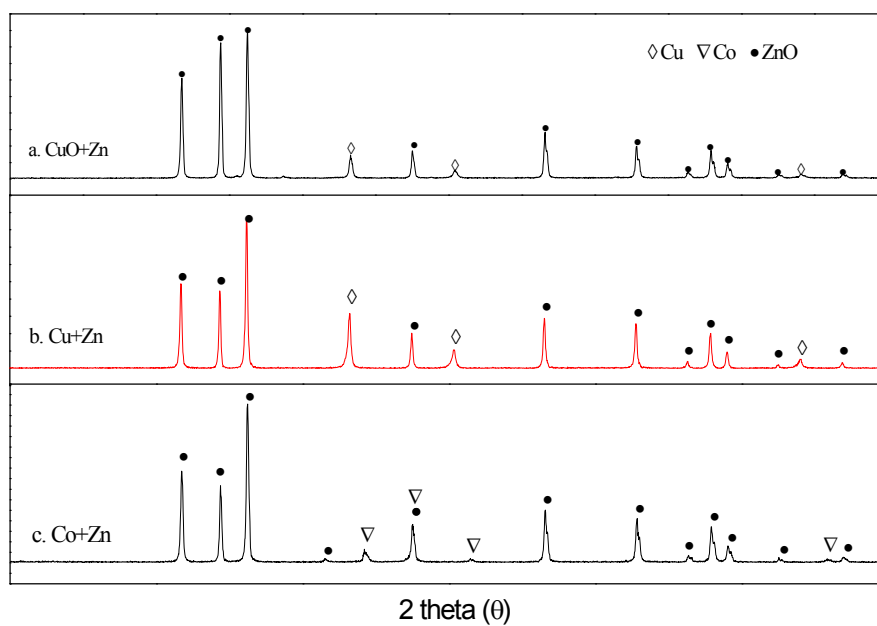

**Figure SI-1.** XRD patterns of solid residue after reaction (catalyst 5 mmol, Zn 25 mmol, H<sub>2</sub>O 7.5 mL, 250 °C, 2 h).

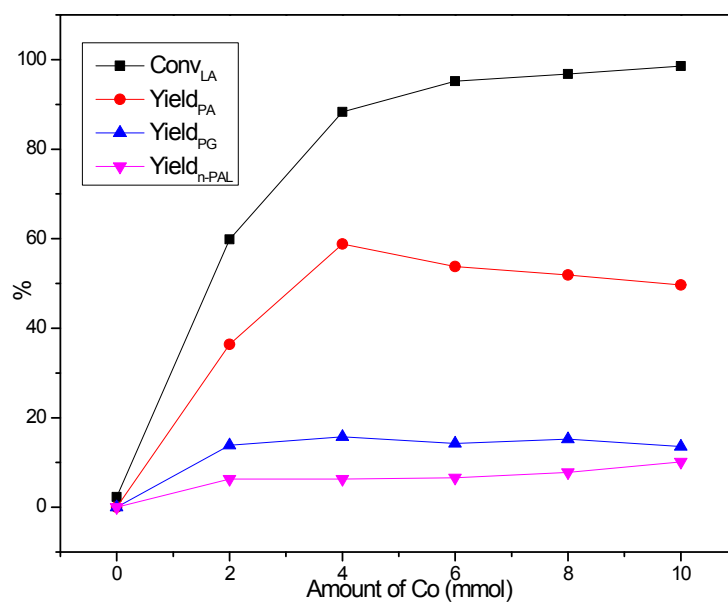

**Figure SI-2.** Effect of Co loading (LA 1.5 mmol, Zn 10 mmol, H<sub>2</sub>O 7.5 mL, 250 °C, 2 h).

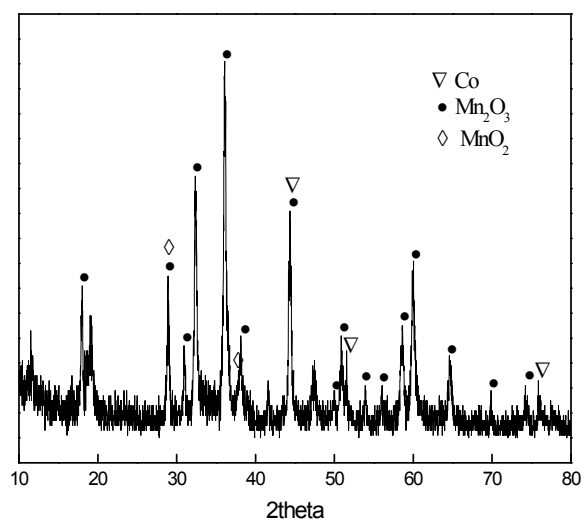

**Figure SI-3.** XRD patterns of precipitates with Mn (Co 5 mmol, Mn 10 mmol, H<sub>2</sub>O 7.5 mL, 250 °C, 2 h).

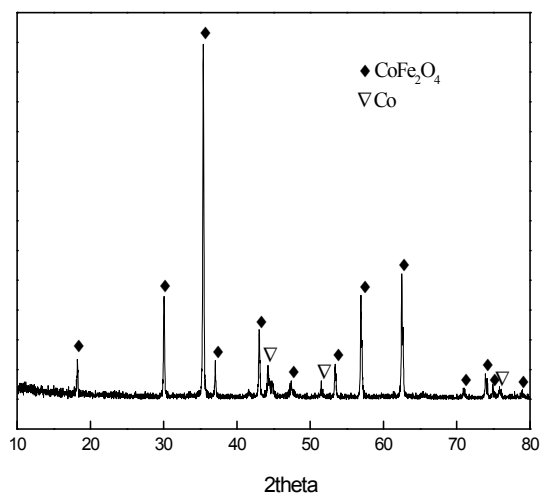

**Figure SI-4.** XRD patterns of precipitates with Fe (Co 5 mmol, Fe 10 mmol, H<sub>2</sub>O 7.5 mL, 250 °C, 2 h).

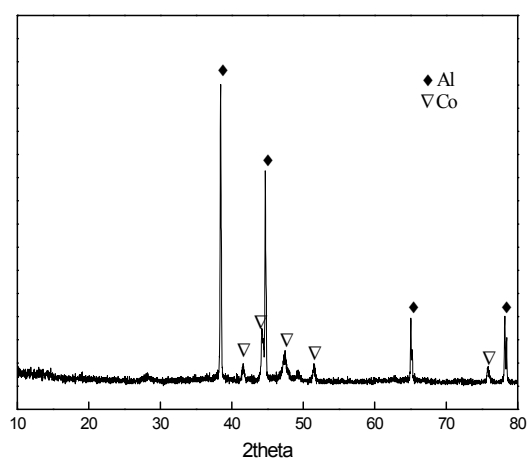

**Figure SI-5.** XRD patterns of precipitates with Al (Co 5 mmol, Al 10 mmol, H<sub>2</sub>O 7.5 mL, 250 °C, 2 h).

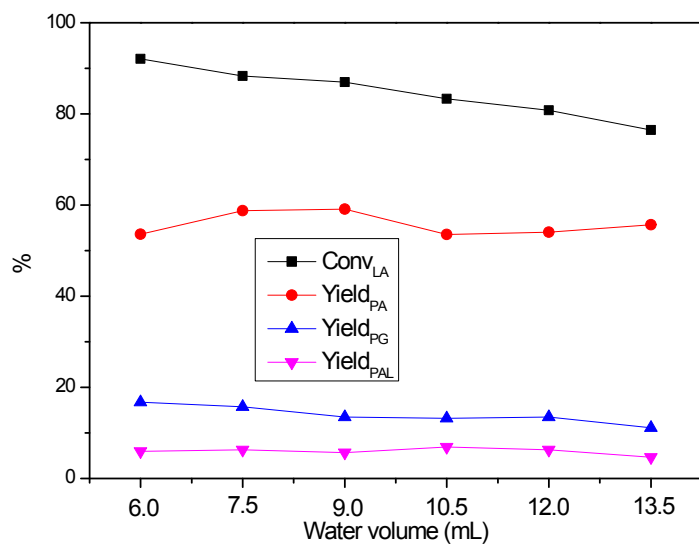

**Figure SI-6.** Effect of water volume (LA 1.5 mmol, Zn 10 mmol, Co 4 mmol, 250 °C, 2 h).

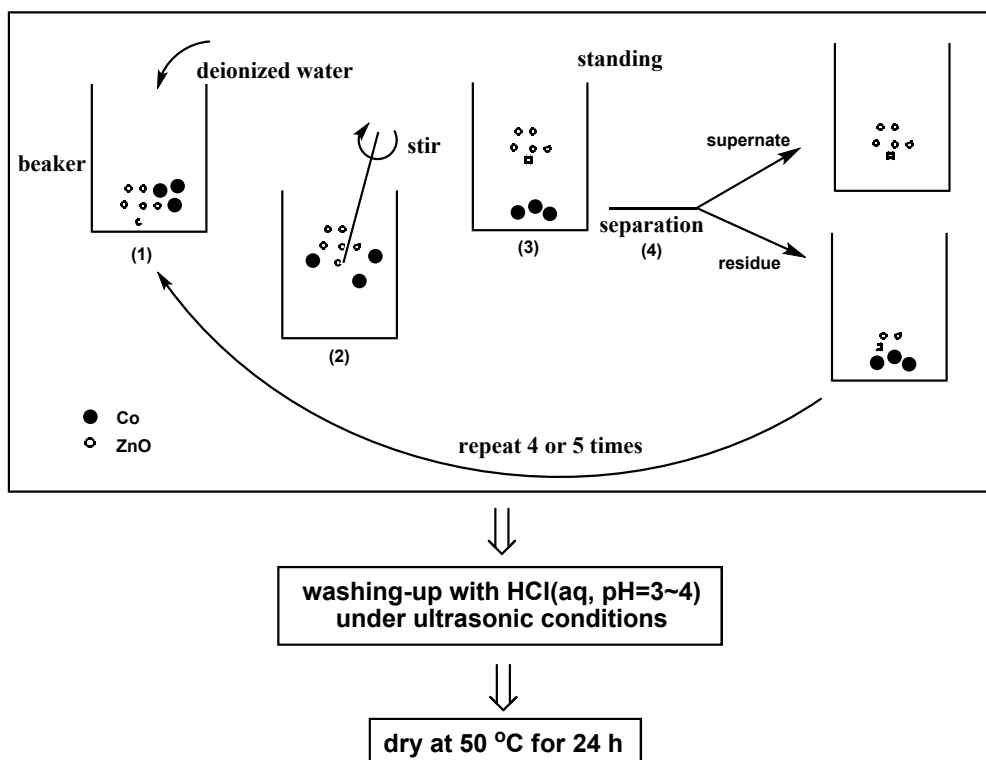

**Figure SI-7.** Recovery process of Co catalyst from the solid residues.

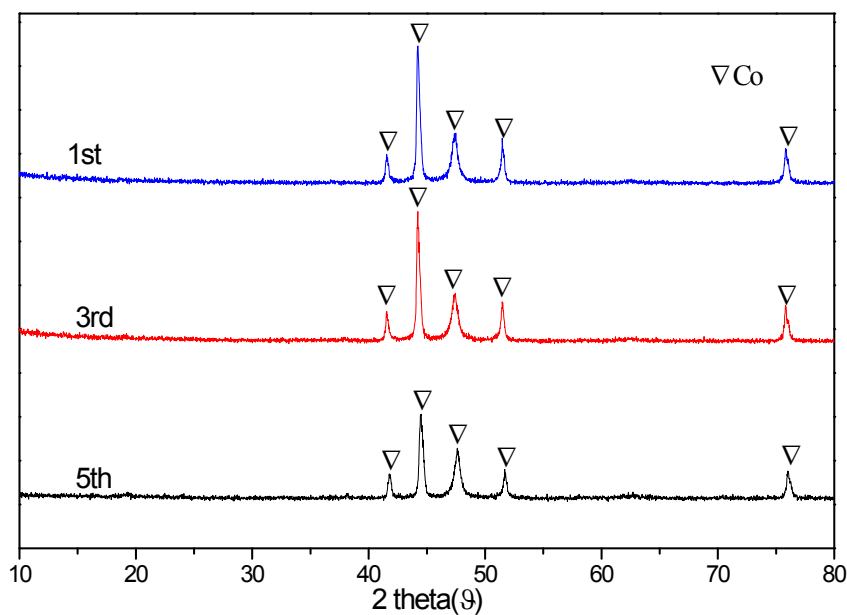

**Figure SI-8.** XRD patterns of recycled Co (LA 1.5 mmol, Zn 10 mmol, Co 4 mmol, H<sub>2</sub>O 7.5 mL, 250 °C, 2 h).

**Table SI-1.** Effect of Co loading. <sup>a</sup>

| Entry | Co loading (mmol) | LA conv. (%) | Yield (%) |      |      | Total |
|-------|-------------------|--------------|-----------|------|------|-------|
|       |                   |              | PA        | PG   | NPA  |       |
| 1     | 0                 | 2.3          | 0         | 0    | 0    | 0     |
| 2     | 2                 | 59.8         | 36.4      | 13.9 | 6.3  | 56.6  |
| 3     | 4                 | 88.3         | 58.8      | 15.8 | 6.3  | 80.9  |
| 4     | 6                 | 95.2         | 53.8      | 14.3 | 6.6  | 74.7  |
| 5     | 8                 | 96.8         | 51.9      | 15.2 | 7.8  | 74.9  |
| 6     | 10                | 98.6         | 49.7      | 13.6 | 10.2 | 73.5  |

<sup>a</sup> Reaction conditions: LA 1.5 mmol, Zn 10 mmol, H<sub>2</sub>O 7.5 mL, 250 °C, 2 h.

**Table SI-2.** Effect of reductants. <sup>a</sup>

| Entry          | Reductant | LA conv. (%) | Selectivity (%) |      |     | Total yield (%) |
|----------------|-----------|--------------|-----------------|------|-----|-----------------|
|                |           |              | PA              | PG   | NPA |                 |
| 1              | Zn        | 88.3         | 66.6            | 17.9 | 7.1 | 80.9            |
| 2 <sup>b</sup> | Al        | 83.7         | 63.0            | 2.6  | 1.4 | 56.2            |
| 3              | Fe        | 9.6          | 61.4            | 12.5 | 0   | 7.1             |
| 4              | Mn        | 3.5          | 25.7            | 5.7  | 0   | 1.1             |

<sup>a</sup> Reaction conditions: LA 1.5 mmol, reductant 10 mmol, Co 4 mmol, H<sub>2</sub>O 7.5 mL, 250 °C, 2 h. <sup>b</sup> Part of Al was oxidized, but oxides was not detected by XRD.

**Table SI-3.** Effect of amount of Zn. <sup>a</sup>

| Entry | Amount (mmol) | LA conv. (%) | Yield (%) |      |      | Total |
|-------|---------------|--------------|-----------|------|------|-------|
|       |               |              | PA        | PG   | NPA  |       |
| 1     | 5             | 68.2         | 42.1      | 6.1  | 2.2  | 50.4  |
| 2     | 10            | 88.3         | 58.8      | 15.8 | 6.3  | 80.9  |
| 3     | 15            | 92.1         | 53.0      | 21.8 | 7.6  | 82.4  |
| 4     | 20            | 96.4         | 40.3      | 31.1 | 14.5 | 85.9  |
| 5     | 25            | 96.8         | 30.9      | 47.3 | 17.8 | 96.0  |

<sup>a</sup> Reaction conditions: LA 1.5 mmol, Co 4 mmol, H<sub>2</sub>O 7.5 mL, 250 °C, 2 h.

**Table SI-4.** Effect of water volume. <sup>a</sup>

| Entry | Water volume (mL) | LA conv. (%) | Yield (%) |      |     | Total |
|-------|-------------------|--------------|-----------|------|-----|-------|
|       |                   |              | PA        | PG   | NPA |       |
| 1     | 6.0               | 92.1         | 53.6      | 16.7 | 6.0 | 76.3  |
| 2     | 7.5               | 88.3         | 58.8      | 15.8 | 6.3 | 80.9  |
| 3     | 9.0               | 86.9         | 59.1      | 13.5 | 5.7 | 78.3  |
| 4     | 10.5              | 83.3         | 53.6      | 13.2 | 6.9 | 73.7  |
| 5     | 12.0              | 80.8         | 54.0      | 13.5 | 6.3 | 73.3  |
| 6     | 13.5              | 76.5         | 55.7      | 11.1 | 4.7 | 71.5  |

<sup>a</sup> Reaction conditions: LA 1.5 mmol, Zn 10 mmol, Co 4 mmol, 250 °C, 2 h.

**Table SI-5.** Recyclability of Co catalyst. <sup>a</sup>

| Entry | Catalyst | Yield of PA (%) |
|-------|----------|-----------------|
| 1     | fresh    | 58.8            |
| 2     | reuse 1  | 60.6            |
| 3     | reuse 2  | 57.9            |
| 4     | reuse 3  | 56.0            |
| 5     | reuse 4  | 58.7            |

<sup>a</sup> Reaction conditions: LA 1.5 mmol, Zn 10 mmol, Co 4 mmol, H<sub>2</sub>O 7.5 mL, 250 °C, 2 h.
